# Supplementary material
Source: publisher site journal article supplement (https://www.dovepress.com/article/332909)
Supplement: Supplementary file 1 [file get_supplementary_file.php]

# Effects of nanoceria on human platelet functions and blood coagulation

## (Supplementary data)

**Supplementary Table 1:** Nanoceria dose and counts used in experiments.

| Code  | Number of nanoceria particles per platelet (in washed platelets and PRP samples) | Nanoceria particle count per ml of sample (washed platelets, PRP, whole blood and fibrinogen samples) | Approximate weight/volume of nanoceria in samples |
|-------|----------------------------------------------------------------------------------|-------------------------------------------------------------------------------------------------------|---------------------------------------------------|
| NC0   | 00                                                                               | 00                                                                                                    | 00                                                |
| NC50  | 50                                                                               | $100 \times 10^8$                                                                                     | ~ 27 $\mu\text{g/ml}$                             |
| NC300 | 300                                                                              | $600 \times 10^8$                                                                                     | ~ 162 $\mu\text{g/ml}$                            |
| NC600 | 600                                                                              | $1200 \times 10^8$                                                                                    | ~ 324 $\mu\text{g/ml}$                            |

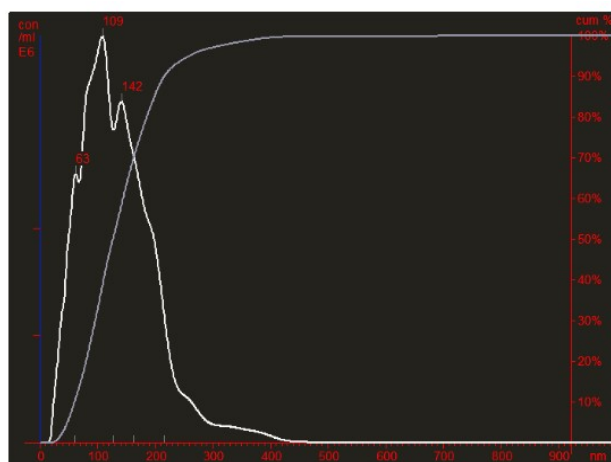

Particle Size / Concentration

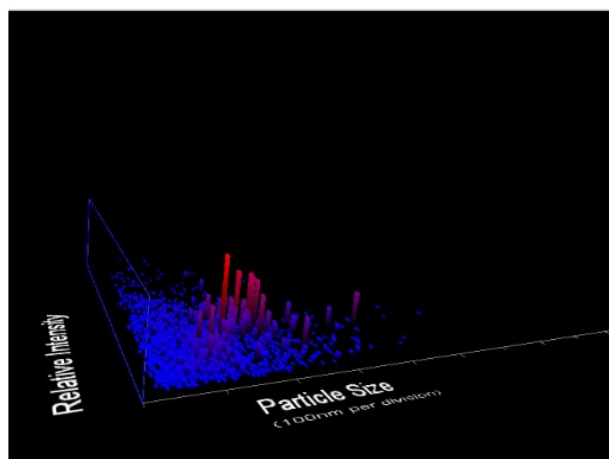

Particle Size / Relative Intensity 3D plot

| Bin Centre (nm) | Concentration (E6 particles/ml) | Percentile Undersize (%) |
|-----------------|---------------------------------|--------------------------|
| 10              | 0.092                           | 0.017                    |
| 30              | 13.580                          | 2.542                    |
| 50              | 36.822                          | 9.387                    |
| 70              | 52.696                          | 19.183                   |
| 90              | 68.405                          | 31.899                   |
| 110             | 73.464                          | 45.555                   |
| 130             | 60.948                          | 56.885                   |
| 150             | 60.469                          | 68.126                   |
| 170             | 50.293                          | 77.475                   |
| 190             | 41.275                          | 85.148                   |

| Bin Centre (nm) | Concentration (E6 particles/ml) | Percentile Undersize (%) |
|-----------------|---------------------------------|--------------------------|
| 690             | 0.000                           | 100.000                  |
| 710             | 0.000                           | 100.000                  |
| 730             | 0.000                           | 100.000                  |
| 750             | 0.000                           | 100.000                  |
| 770             | 0.000                           | 100.000                  |
| 790             | 0.000                           | 100.000                  |
| 810             | 0.000                           | 100.000                  |
| 830             | 0.000                           | 100.000                  |
| 850             | 0.000                           | 100.000                  |
| 870             | 0.000                           | 100.000                  |

### Results

**Mean:** 138 nm  
**Mode:** 109 nm  
**SD:** 67 nm  
**D10:** 61 nm  
**D50:** 127 nm  
**D90:** 216 nm  
**User Lines:** 0 nm, 0 nm  
**Concentration:** 5.38 E8 particles/ml  
**Completed Tracks:** 1933

**Supplementary figure 1:** Exported data of nanoceria suspension analyzed by nanoparticle tracking analysis. Figure is representative of 4 experiments.

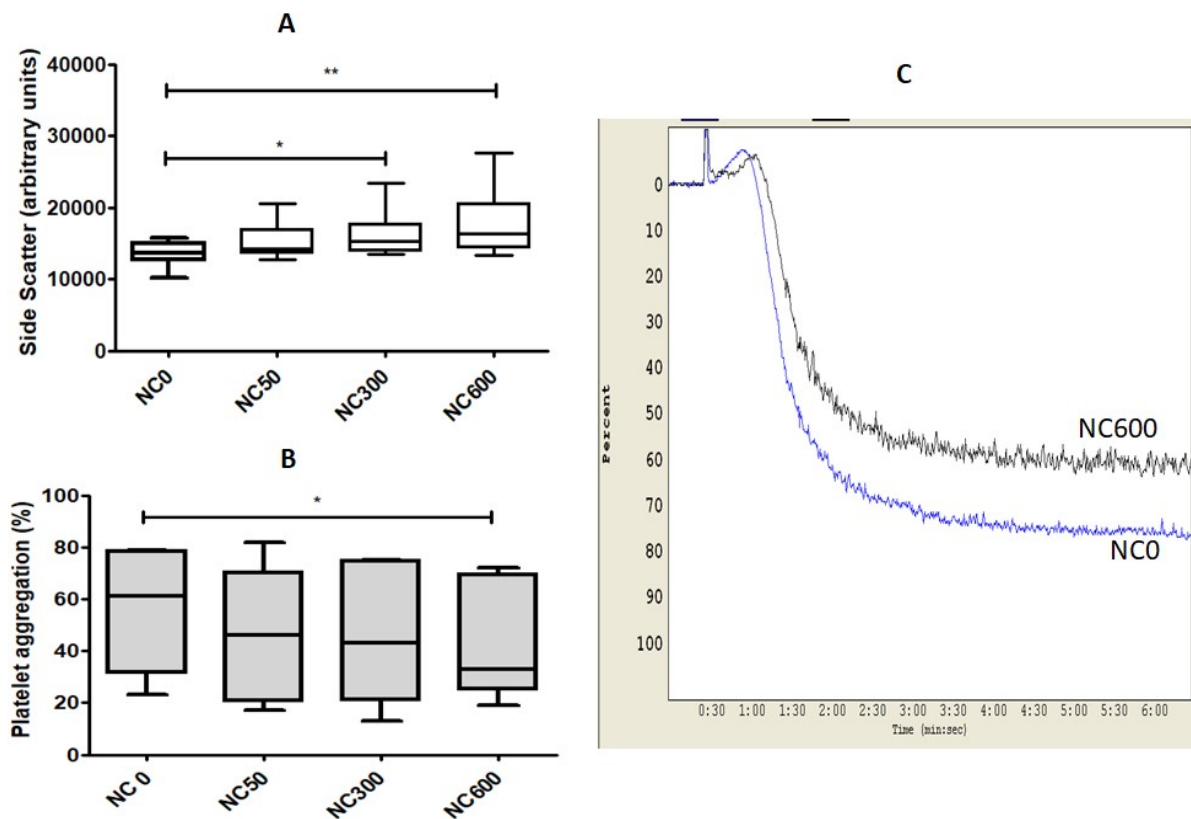

**Supplementary figure 2:** A, flow cytometry of platelets (in PRP) after incubation with increasing concentrations of nanoceria showing dose-dependent rise in side scatter (SSC). (n=6, repeated measure ANOVA). B, nanoceria-mediated inhibition of collagen-induced platelet aggregation in PRP (n=5, repeated measure ANOVA). C, Collagen induced platelet aggregation in PRP, in presence or absence of nanoceria.

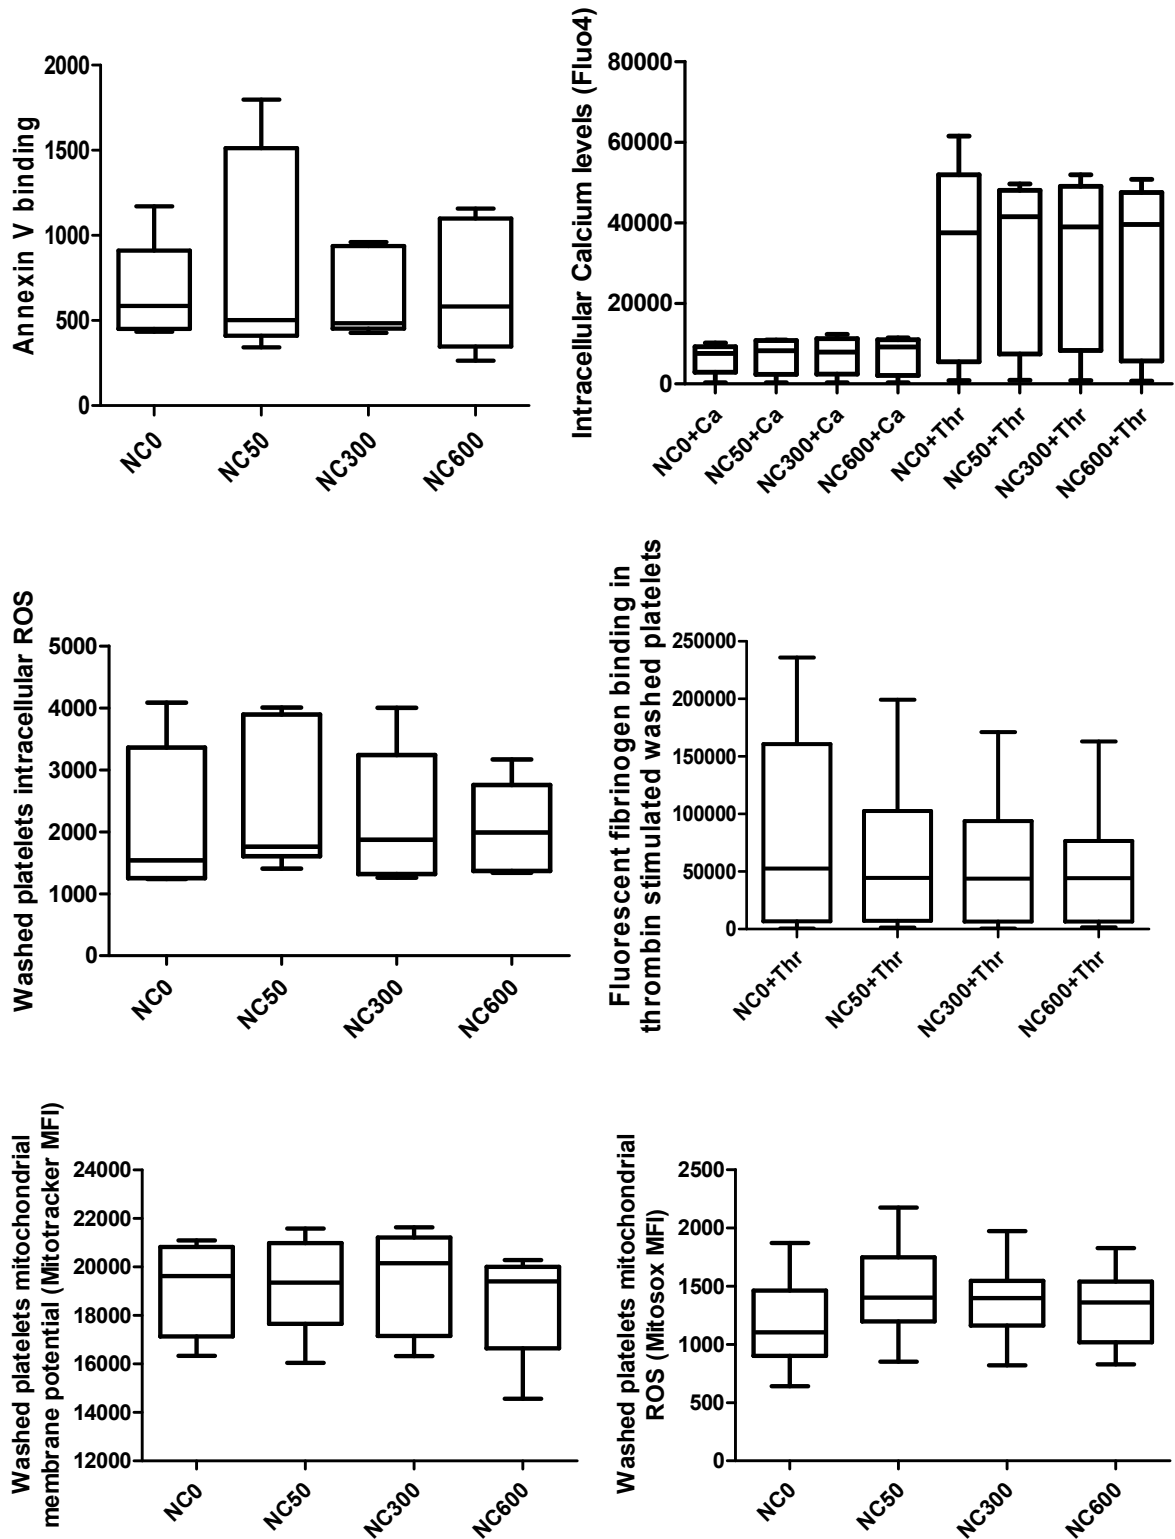

**Supplementary figure 3:** Intracellular calcium level, Annexin V binding and fibrinogen binding capacity of washed platelets (with and without nanoceria) after stimulation with 0.5 U thrombin (n=5, repeated measure ANOVA).

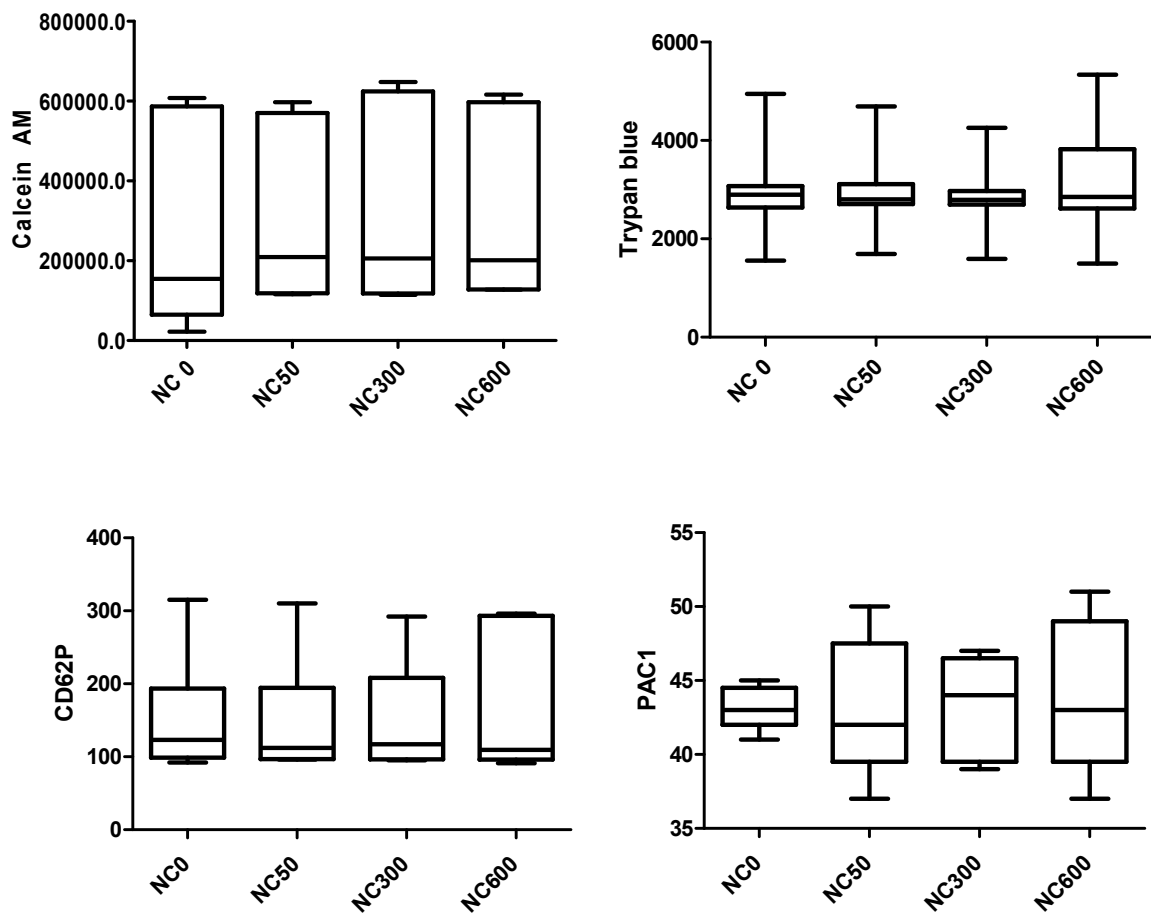

**Supplementary figure 4:** Nanoceria treatment in PRP did not affect cell viability (Calcein-AM staining, n=5), membrane integrity (Trypan blue staining, n=7), PAC1 binding (n=5) and P-selectin expression (n=5) in platelets.
